# Supplementary material for: Triplet–triplet energy transfer from Bi3+to Sb3+in zero-dimensional indium hybridsviaa B-site co-doping strategy toward white-light emission
Source: Royal Society of Chemistry journal article supplement (doi:10.1039/d2qi01631a), 2022-01-01
Supplement: d2qi01631a1.pdf [file d2qi01631a1.pdf]

## Supporting Information

### **Triplet-triplet energy transfer from Bi<sup>3+</sup> to Sb<sup>3+</sup> in zero-dimensional indium hybrids via B-site co-doping strategy toward white-light emission**

Qiqiong Ren,<sup>a</sup> Jian Zhang,<sup>a</sup> Maxim S. Molokeyev,<sup>b,c,d</sup> Guojun Zhou<sup>\*a</sup> and Xian-Ming Zhang<sup>\*a,e</sup>

*a* Key Laboratory of Magnetic Molecules and Magnetic Information Materials (Ministry of Education), School of Chemistry and Material Science, Shanxi Normal University, Taiyuan 030031, China.

*b* Laboratory of Crystal Physics, Kirensky Institute of Physics, Federal Research Center KSC SB RAS, Krasnoyarsk 660036, Russia.

*c* Research and Development Department, Kemerovo State University, Kemerovo, 650000, Russia.

*d* Department of Physics, Far Eastern State Transport University, Khabarovsk 680021, Russia.

*e* College of Chemistry & Chemical Engineering, Key Laboratory of Interface Science and Engineering in Advanced Material, Ministry of Education, Taiyuan University of Technology, Taiyuan, Shanxi 030024, P. R. China.

*\*Corresponding author. Key Laboratory of Magnetic Molecules and Magnetic Information Materials (Ministry of Education), School of Chemistry and Material Science, Shanxi Normal University, Taiyuan 030031, China*

*E-mail addresses: [zhougj@sxnu.edu.cn](mailto:zhougj@sxnu.edu.cn) (G. J. Zhou), [zhangxm@dns.sxnu.edu.cn](mailto:zhangxm@dns.sxnu.edu.cn) (X.M. Zhang).*

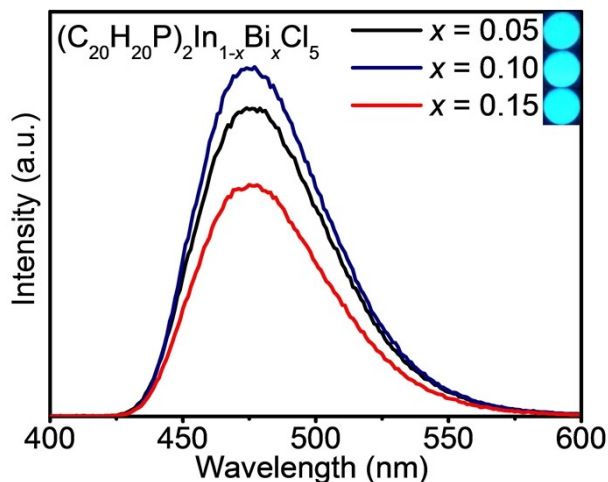

**Fig. S1** PL spectra of  $(C_{20}H_{20}P)_2In_{1-x}Bi_xCl_5$  ( $x = 0.05, 0.10, 0.15$ ) excited at 365 nm. Insets show corresponding optical photographs of above compounds excited by 365 nm UV lamp.

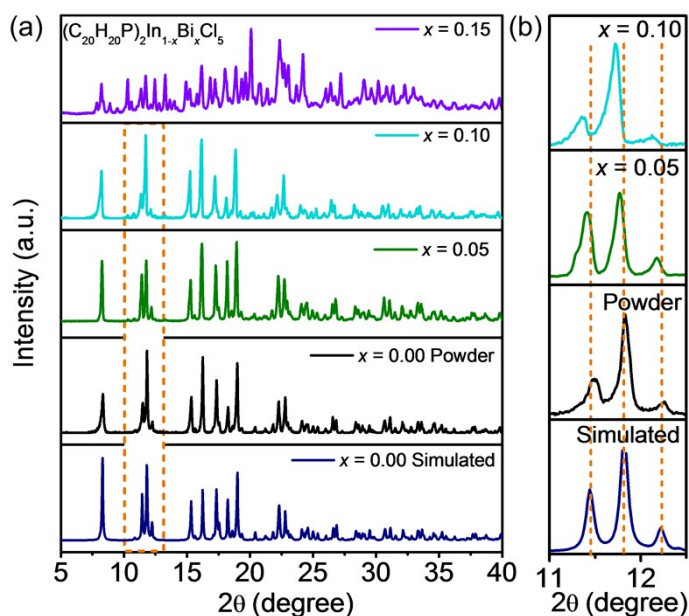

**Fig. S2** (a) PXRD patterns of  $(C_{20}H_{20}P)_2In_{1-x}Bi_xCl_5$  ( $x = 0, 0.05, 0.10, 0.15$ ) and standard diffraction pattern of  $(C_{20}H_{20}P)_2InCl_5$ . (b) Selected diffraction peaks in the range of  $11^\circ$ – $12.5^\circ$  of  $(C_{20}H_{20}P)_2In_{1-x}Bi_xCl_5$  ( $x = 0, 0.05, 0.10$ ).

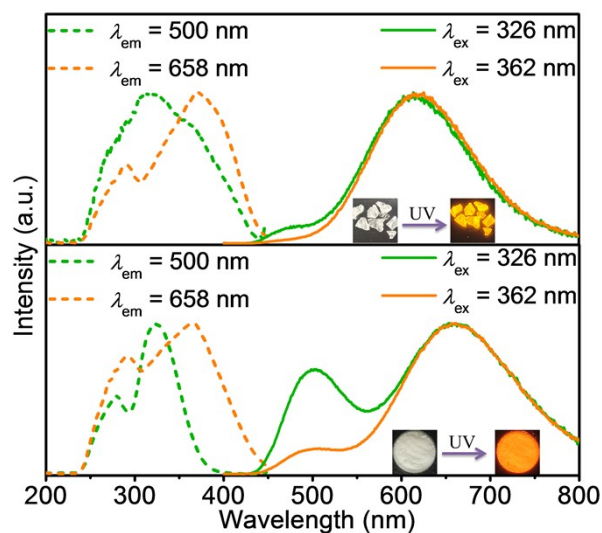

**Fig. S3** PLE and PL spectra of single crystal (top) and powder (bottom) samples of  $(\text{C}_{20}\text{H}_{20}\text{P})_2\text{In}_{1-x-y}\text{Bi}_x\text{Sb}_y\text{Cl}_5$  ( $x = 0, y = 0.10$ ). Insets show the pictures of single crystal (top) and powder (bottom) under daylight and UV excitation.

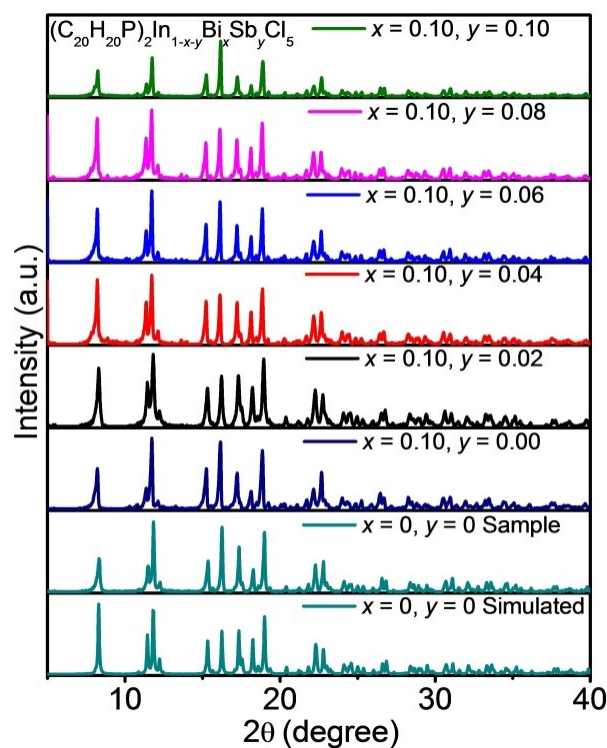

**Fig. S4** PXRD patterns of  $(\text{C}_{20}\text{H}_{20}\text{P})_2\text{In}_{1-x-y}\text{Bi}_x\text{Sb}_y\text{Cl}_5$  ( $x = 0, y = 0$ ) ( $x = 0.10, y = 0-0.10$ ) and standard diffraction pattern of  $(\text{C}_{20}\text{H}_{20}\text{P})_2\text{InCl}_5$ .

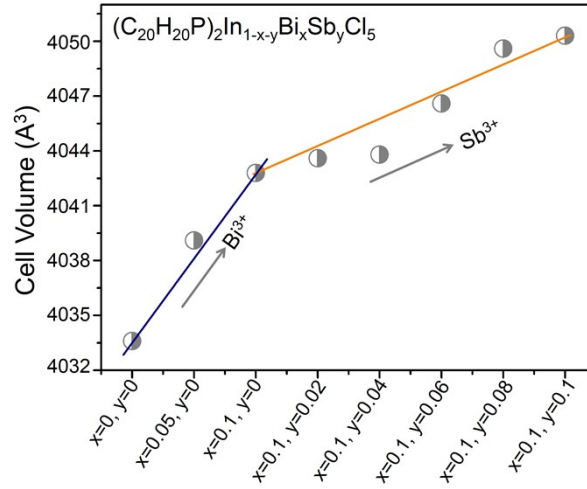

**Fig. S5** Variation of unit cell volume with  $x$  and  $y$  of  $(C_{20}H_{20}P)_2In_{1-x}Bi_xSb_yCl_5$ .

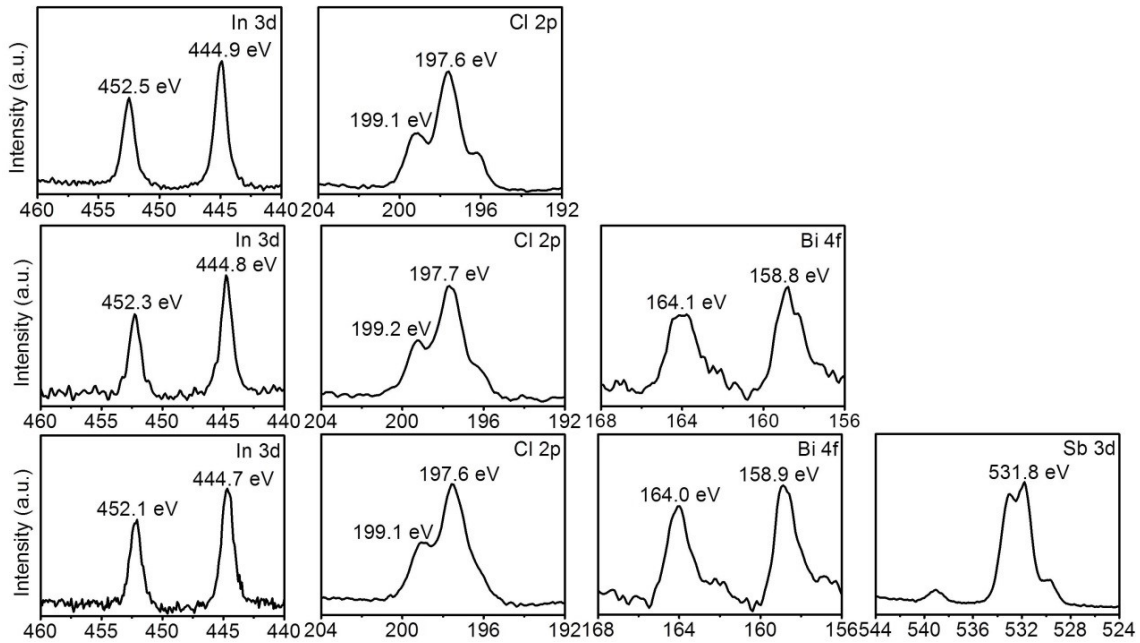

**Fig. S6** XPS spectra corresponding to In 3d, Cl 2p, Bi 4f and Sb 3d, respectively, of (a)  $(C_{20}H_{20}P)_2InCl_5$ , (b)  $(C_{20}H_{20}P)_2In_{1-x}Bi_xSb_yCl_5$  ( $x = 0.10$ ,  $y = 0$ ) and (c)  $(C_{20}H_{20}P)_2In_{1-x}Bi_xSb_yCl_5$  ( $x = 0.10$ ,  $y = 0.10$ ).

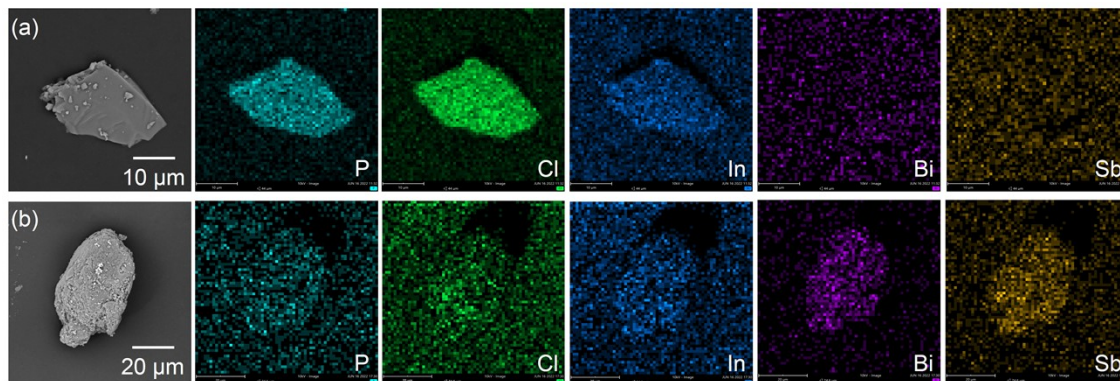

**Fig. S7** SEM images and EDS elemental mapping images showing the homogeneous distribution of P, Cl, In, Bi and Sb in different compounds of (a)  $(C_{20}H_{20}P)_2InCl_5$  and (b)  $(C_{20}H_{20}P)_2In_{1-x-y}Bi_xSb_yCl_5$  ( $x = 0.10, y = 0.10$ ).

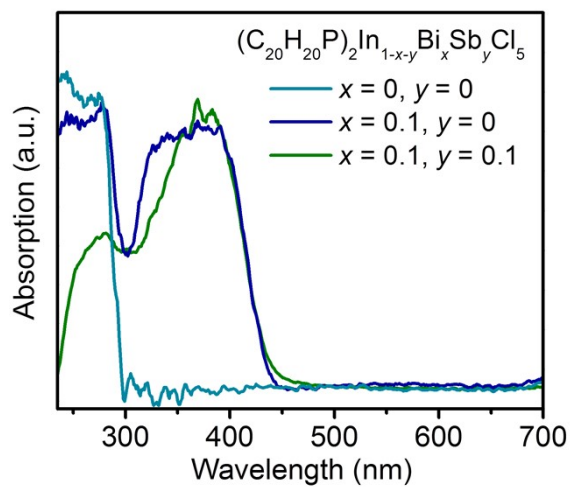

**Fig. S8** Absorption spectra of compounds  $(C_{20}H_{20}P)_2In_{1-x-y}Bi_xSb_yCl_5$  ( $x = 0, y = 0$ ) ( $x = 0.10, y = 0$ ) ( $x = 0.10, y = 0.10$ ).

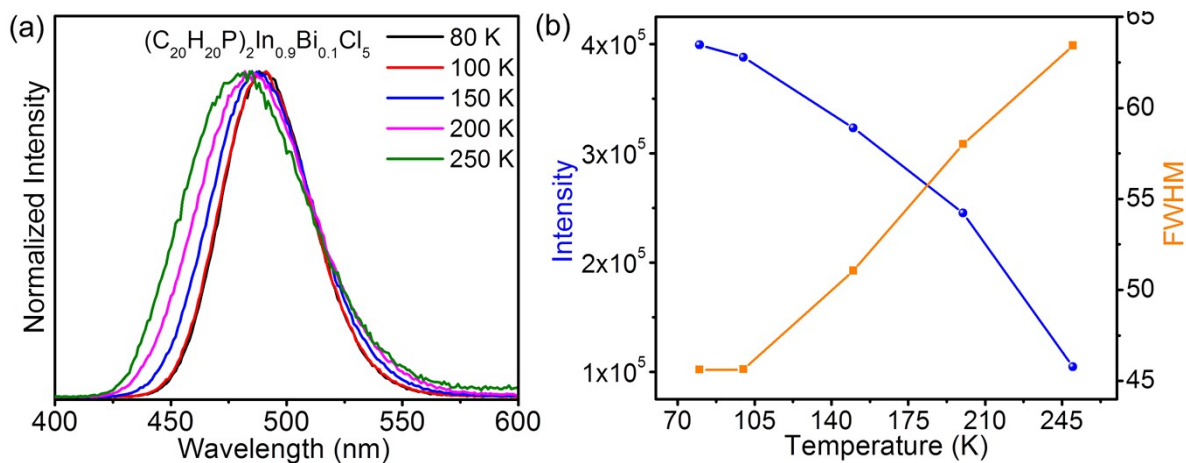

**Fig. S9** (a) Normalized temperature-dependent emission spectra of  $(C_{20}H_{20}P)_2In_{1-x-y}Bi_xSb_yCl_5$  ( $x = 0.10$ ,  $y = 0$ ). (b) Temperature dependence of PL intensity and FWHM.

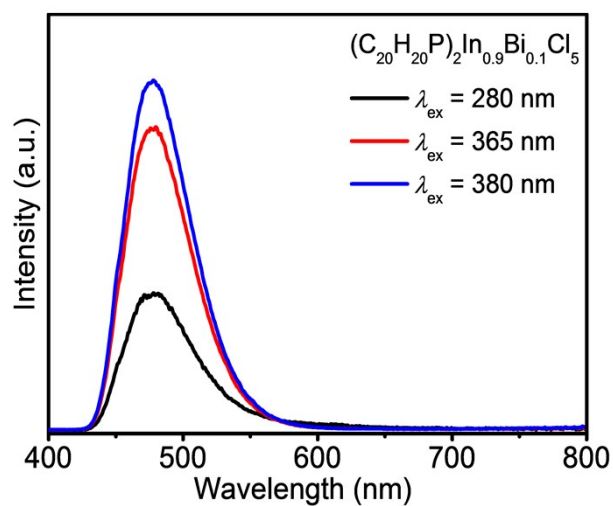

**Fig. S10** Emission spectra of  $(C_{20}H_{20}P)_2In_{1-x-y}Bi_xSb_yCl_5$  ( $x = 0.10$ ,  $y = 0$ ) monitored at different excitation wavelengths.

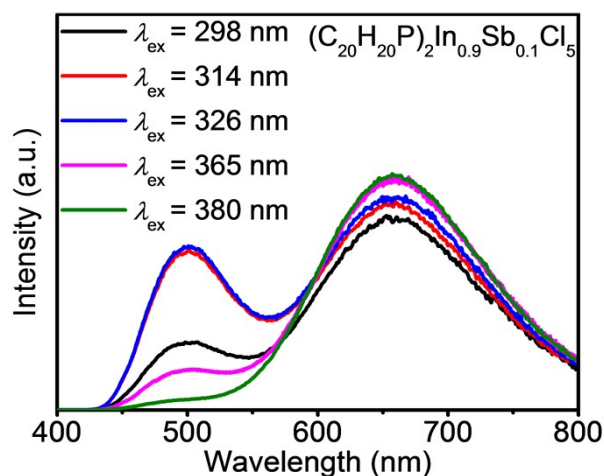

**Fig. S11** Excitation-dependent PL spectra of  $(\text{C}_{20}\text{H}_{20}\text{P})_2\text{In}_{1-x-y}\text{Bi}_x\text{Sb}_y\text{Cl}_5$  ( $x = 0$ ,  $y = 0.10$ ) with the excitation wavelength ranging from 298 to 380 nm.

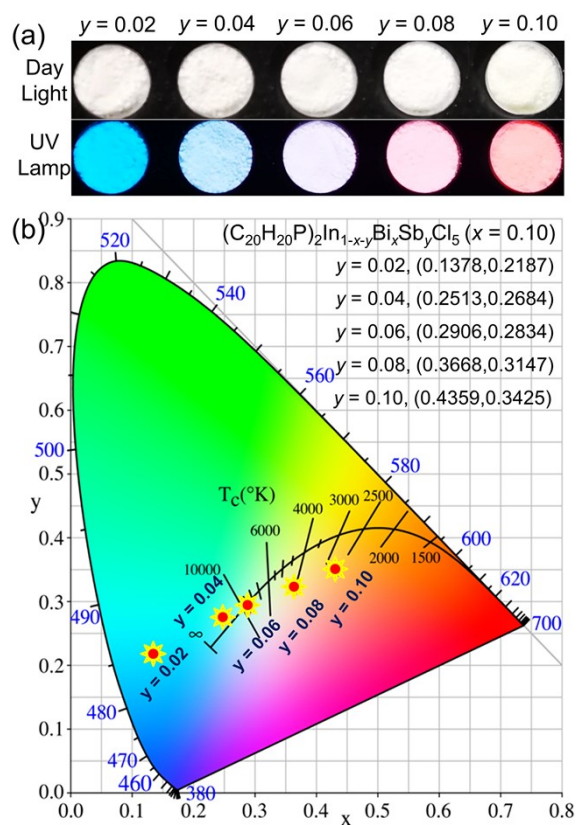

**Fig. S12** (a) Photographs of  $(\text{C}_{20}\text{H}_{20}\text{P})_2\text{In}_{1-x-y}\text{Bi}_x\text{Sb}_y\text{Cl}_5$  ( $x = 0.10$ ,  $y = 0.02-0.10$ ) under daylight (top) and UV lamp (bottom). (b) The corresponding CIE chromaticity diagrams.



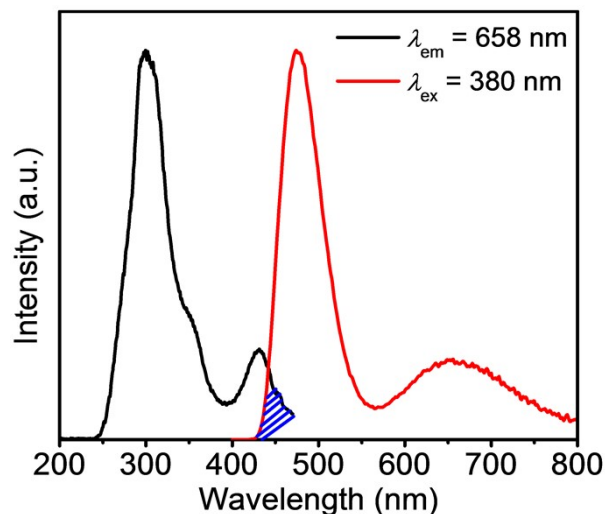

**Fig. S13** Normalized PLE and PL spectra of compound  $(C_{20}H_{20}P)_2In_{1-x-y}Bi_xSb_yCl_5$  ( $x = 0.10$ ,  $y = 0.04$ ). The blue shading represents the intersection.

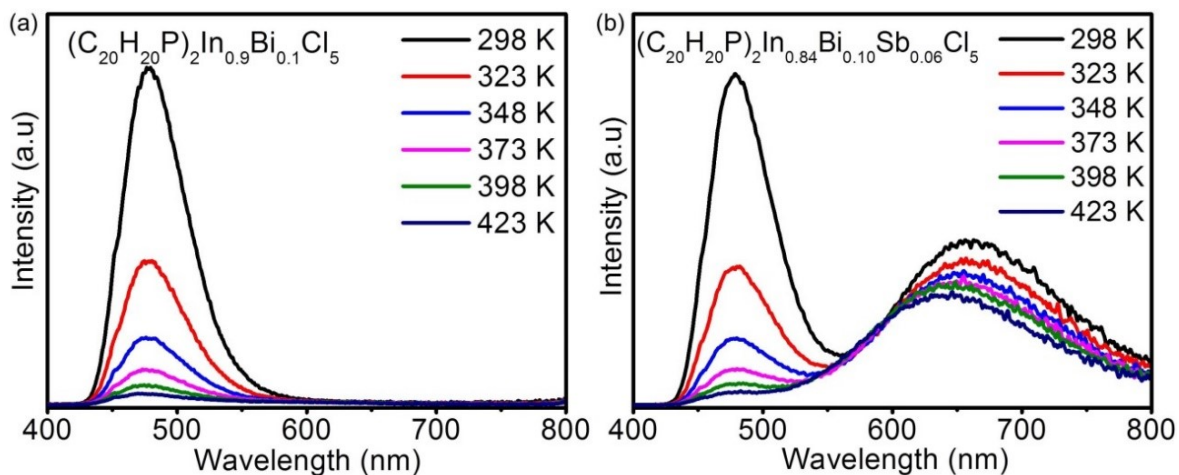

**Fig. S14** Temperature-dependent PL spectra of (a)  $(C_{20}H_{20}P)_2In_{1-x-y}Bi_xSb_yCl_5$  ( $x = 0.10$ ,  $y = 0$ ) and (b)  $(C_{20}H_{20}P)_2In_{1-x-y}Bi_xSb_yCl_5$  ( $x = 0.10$ ,  $y = 0.06$ ) under 365 nm excitation ranging from 298 K to 423K.



**Table S1.** Main parameters of processing and refinement of  $(\text{C}_{20}\text{H}_{20}\text{P})_2\text{In}_{1-x-y}\text{Bi}_x\text{Sb}_y\text{Cl}_5$  ( $x = 0, y = 0$ ) ( $x = 0.10, y = 0$ ) ( $x = 0.10, y = 0.10$ ).

| <b>Compound</b>               | <b><math>x = 0, y = 0</math></b> | <b><math>x = 0.1, y = 0</math></b> | <b><math>x = 0.1, y = 0.1</math></b> |
|-------------------------------|----------------------------------|------------------------------------|--------------------------------------|
| Sp.Gr.                        | $I2/a$                           | $I2/a$                             | $I2/a$                               |
| $a, \text{Å}$                 | 17.6594 (5)                      | 17.6602 (9)                        | 17.6770 (8)                          |
| $b, \text{Å}$                 | 14.7450 (4)                      | 14.7590 (7)                        | 14.7568 (6)                          |
| $c, \text{Å}$                 | 16.7561 (5)                      | 16.777 (1)                         | 16.7904 (8)                          |
| $\beta, ^\circ$               | 112.414 (2)                      | 112.405 (3)                        | 112.370 (2)                          |
| $V, \text{Å}^3$               | 4033.6 (2)                       | 4042.8 (4)                         | 4050.3 (3)                           |
| $2\theta$ -interval, $^\circ$ | 5-120                            | 5-120                              | 5-120                                |
| $R_{wp}, \%$                  | 8.07                             | 9.72                               | 8.17                                 |
| $R_p, \%$                     | 5.99                             | 7.20                               | 5.73                                 |
| $R_{exp}, \%$                 | 3.56                             | 3.51                               | 3.60                                 |
| $\chi^2$                      | 2.26                             | 2.77                               | 2.27                                 |
| $R_B, \%$                     | 3.35                             | 3.67                               | 2.31                                 |

**Table S2.** ICP-AES results of  $(\text{C}_{20}\text{H}_{20}\text{P})_2\text{In}_{1-x-y}\text{Bi}_x\text{Sb}_y\text{Cl}_5$  ( $x = 0, y = 0$ ) ( $x = 0.10, y = 0$ ) ( $x = 0.10, y = 0.10$ ).

| <b>Compound</b> | <b><math>(\text{C}_{20}\text{H}_{20}\text{P})_2\text{InCl}_5</math></b> |        | <b><math>(\text{C}_{20}\text{H}_{20}\text{P})_2\text{In}_{0.9}\text{Bi}_{0.1}\text{Cl}_5</math></b> |        | <b><math>(\text{C}_{20}\text{H}_{20}\text{P})_2\text{In}_{0.8}\text{Bi}_{0.1}\text{Sb}_{0.1}\text{Cl}_5</math></b> |        |
|-----------------|-------------------------------------------------------------------------|--------|-----------------------------------------------------------------------------------------------------|--------|--------------------------------------------------------------------------------------------------------------------|--------|
|                 | Mass%                                                                   | Atom%  | Mass%                                                                                               | Atom%  | Mass%                                                                                                              | Atom%  |
| In              | 12.28                                                                   | 0.1070 | 11.12                                                                                               | 0.0968 | 9.20                                                                                                               | 0.0801 |
| Bi              |                                                                         |        | 1.19                                                                                                | 0.0057 | 1.24                                                                                                               | 0.0059 |
| Sb              |                                                                         |        |                                                                                                     |        | 1.01                                                                                                               | 0.0083 |

**Table S3.** Calculated excitation energies and oscillator strengths of [SbCl<sub>5</sub>]<sup>2-</sup> and [BiCl<sub>5</sub>]<sup>2-</sup>.

| [SbCl <sub>5</sub> ] <sup>2-</sup> | excitation energies | oscillator strengths | [BiCl <sub>5</sub> ] <sup>2-</sup> | excitation energies | oscillator strengths |
|------------------------------------|---------------------|----------------------|------------------------------------|---------------------|----------------------|
| S <sub>0</sub> →S <sub>1</sub>     | 4.2170 eV           | 0.1259               | S <sub>0</sub> →S <sub>1</sub>     | 4.5432 eV           | 0.0737               |
| S <sub>0</sub> →S <sub>2</sub>     | 4.9471 eV           | 0.3132               | S <sub>0</sub> →S <sub>2</sub>     | 4.5472 eV           | 0.0739               |
| S <sub>0</sub> →S <sub>3</sub>     | 5.4933 eV           | 0.3826               |                                    |                     |                      |
| S <sub>0</sub> →T <sub>1</sub>     | 0.6639 eV           | 0.0003               |                                    |                     |                      |
| S <sub>0</sub> →T <sub>3</sub>     | 2.0150 eV           | 0.1525               | S <sub>0</sub> →T <sub>3</sub>     | 1.1200 eV           | 0.0006               |
| S <sub>0</sub> →T <sub>4</sub>     | 2.2446 eV           | 0.0063               |                                    |                     |                      |
| S <sub>0</sub> →T <sub>5</sub>     | 2.3158 eV           | 0.0047               |                                    |                     |                      |
